# Supplementary material
Source: MDPI journal article supplement (https://www.mdpi.com/1999-4907/13/3/440)
Supplement: s1 [file s1]

Archive with 2 entries (2 files):
- Suppl Figures.pdf
- Suppl Tables_rev.pdf
