# Supplementary material
Source: MDPI journal article supplement (https://www.mdpi.com/1999-4907/13/3/440)
Supplement: s1 [file s1 › Suppl Tables_rev.pdf]

**Table S1** Agreement of year-to-year changes in ring width series of *Alnus alnobetula* among study plots. Percentage of sign agreement ( $W$ , “Gleichläufigkeit” [51]), correlation coefficient ( $t$  [52]) and number of overlapping years ( $n$ ) are shown in the sequence  $W / t / n$ . \*\*\* =  $P < 0.001$ ; \*\* =  $P < 0.01$ ; \* =  $P < 0.05$

|        | Plot 1       | Plot 2      | Plot 3       | Plot 4       | Plot 5      | Plot 6       | Plot 7      | Plot 8      |
|--------|--------------|-------------|--------------|--------------|-------------|--------------|-------------|-------------|
| Plot 1 | -            | 77**/1.0/23 | 54/0.5/27    | 54/1.3/14    | 81**/0.8/17 | 89***/3.0/19 | 71*/3.1/22  | 59/0.9/33   |
| Plot 2 | 77**/1.0/23  | -           | 43/0/24      | 50/2.6/15    | 59/0.8/18   | 79**/1.8/20  | 55/0.3/23   | 57/0.2/24   |
| Plot 3 | 54/0.5/27    | 43/0/24     | -            | 93***/5.5/15 | 65/1.9/18   | 68*/3.7/20   | 55/2.1/23   | 70*/4.1/28  |
| Plot 4 | 54/1.3/14    | 50/2.6/15   | 93***/5.5/15 | -            | 50/1.0/15   | 71*/4.4/15   | 50/1.6/15   | 86**/2.8/15 |
| Plot 5 | 81**/0.8/17  | 59/0.8/18   | 65/1.9/18    | 50/1.0/15    | -           | 82**/1.3/18  | 82**/0.9/18 | 59/0.5/18   |
| Plot 6 | 89***/3.0/19 | 79**/1.8/20 | 68*/3.7/20   | 71*/4.4/15   | 82**/1.3/18 | -            | 68*/4.1/20  | 74*/2.8/20  |
| Plot 7 | 71*/3.1/22   | 55/0.3/23   | 55/2.1/23    | 50/1.6/15    | 82**/0.9/18 | 68*/4.1/20   | -           | 54/2.8/25   |
| Plot 8 | 59/0.9/33    | 57/0.2/24   | 70*/4.1/28   | 86**/2.8/15  | 59/0.5/18   | 74*/2.8/20   | 54/2.8/25   | -           |

**Table S2** Anomalies in January precipitation and summer (June through August) air temperatures in extreme growth years (see Fig. 2c) of *Alnus alnobetula* with respect to the long-term mean (GrDev = growth deviation in units of standard deviation (SD); LTM = long-term mean during 1991–2020).

| Year | GrDev | January precipitation |      | Summer air temperature (°C) |                  |                  |
|------|-------|-----------------------|------|-----------------------------|------------------|------------------|
|      | SD    | mm                    | %    | T <sub>mean</sub>           | T <sub>max</sub> | T <sub>min</sub> |
| 2003 | +2.4  | +17                   | +39  | +2.8                        | +3.0             | +2.6             |
| 2012 | +3.2  | +45                   | +102 | +0.8                        | +0.9             | +0.6             |
| 2015 | +1.3  | +11                   | +26  | +1.8                        | +2.0             | +1.6             |
| 2016 | -1.9  | +1                    | +3   | +0.2                        | +0.3             | +0.2             |
| 2020 | -1.8  | -31                   | -69  | +0.1                        | +0.2             | ±0               |
| LTM  | --    | 45                    | --   | 8.3                         | 11.9             | 5.5              |
